# Supplementary material for: Dry and wet prolines for asymmetric organic solvent-free aldehyde–aldehyde and aldehyde–ketone aldol reactions
Source: Royal Society of Chemistry journal article supplement (doi:10.1039/b613262f), 2006-12-15

## Supporting Information

### Dry and Wet Prolines for Asymmetric Organic-Solvent-Free Aldehyde-Aldehyde and Aldehyde-Ketone Aldol Reactions

Yujiro Hayashi,\* Seiji Aratake, Takahiko Itoh, Tsubasa Okano, Tatsunobu Sumiya, Mitsuru Shoji  
Department of Industrial Chemistry, Faculty of Engineering, Tokyo University of Science,  
Kagurazaka, Shinjuku-ku, Tokyo 162-8601, Japan

#### Typical procedure for the solvent-free cross-aldol reaction between two aldehydes catalyzed by proline

To a mixture of *o*-chlorobenzaldehyde (45  $\mu$ L, 0.4 mmol) and L-proline (5 mg, 0.04 mmol) was added propanal (144  $\mu$ L, 2.0 mmol) successively at 0  $^{\circ}$ C. After stirring the reaction mixture for 48 hours at that temperature, the reaction mixture was cooled at 0  $^{\circ}$ C and MeOH (1 mL) and NaBH<sub>4</sub> (76 mg, 2.0 mmol) was added. The reaction mixture was stirred for 1 hour at 0  $^{\circ}$ C. The reaction was quenched with pH 7.0 phosphate buffer solution and the organic materials were extracted with ethyl acetate three times and the combined organic extracts were dried over anhydrous Na<sub>2</sub>SO<sub>4</sub>, and concentrated in vacuo after filtration. Purification by preparative thin layer chromatography (ethyl acetate) gave (1*R*, 2*R*)-1-(*o*-chlorophenyl)-2-methylpropane-1,3-diol (72 mg, 0.36 mmol) in 90% yield as the diastereomeric mixture (*anti* : *syn* = 12.9 : 1). Enantiometric excess of *anti* aldol was 96%*ee*.

#### **(1*R*, 2*R*)-1-(*o*-Chlorophenyl)-2-methylpropane-1,3-diol (1)**

<sup>1</sup>H NMR (400 MHz, CDCl<sub>3</sub>):  $\delta$  0.81 (3H, t, *J* = 7.2 Hz), 2.02-2.05 (1H, m), 2.80 (1H, br s), 3.30 (1H, br s), 3.61-3.70 (2H, m), 5.05 (1H, d, *J* = 6.8 Hz), 7.14 (1H, t, *J* = 7.6 Hz), 7.22-7.27 (2H, m), 7.50 (1H, d, *J* = 7.6 Hz);

<sup>13</sup>C NMR (100 MHz, CDCl<sub>3</sub>):  $\delta$  13.7, 40.7, 67.1, 76.1, 127.2, 128.1, 128.7, 129.4, 132.5, 140.9;

IR (neat):  $\nu$  3357, 2966, 2932, 1572, 1471, 1438, 1034, 754, 703 cm<sup>-1</sup>;

HRMS(FAB): [M+Na] calcd for [C<sub>10</sub>H<sub>13</sub>ClO<sub>2</sub>Na]: 223.0504, found: 223.0496;

Enantiomeric excess was determined by HPLC with a Chiralpak AS-H column (100:1 hexane:2-propanol,  $\lambda$ =254 nm), 1.2 mL/min; major enantiomer *tr* = 15.2 min, minor enantiomer *tr* = 17.2 min, after conversion to the monobenzoyl ester.

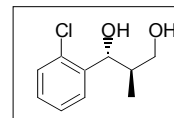

#### **(1*R*, 2*R*)-1-(*p*-Trifluoromethylphenyl)-2-methylpropane-1,3-diol (2)**

<sup>1</sup>H NMR (400 MHz, CDCl<sub>3</sub>):  $\delta$  0.71 (3H, d, *J* = 7.2 Hz), 1.95-2.06 (1H, m), 2.15-2.32 (2H, m), 4.59 (1H, d, *J* = 7.6 Hz), 7.43 (2H, d, *J* = 8.0 Hz), 7.59 (2H, d, *J* = 8.0 Hz);

<sup>13</sup>C NMR (100 MHz, CDCl<sub>3</sub>):  $\delta$  13.7, 41.6, 67.6, 79.8, 125.3, 127.0, 130.2, 147.3;

IR (neat):  $\nu$  3349, 2884, 1619, 1419, 1326, 1164, 1126, 1068, 1017, 841 cm<sup>-1</sup>;

HRMS(FAB): [M+Na] calcd for [C<sub>11</sub>H<sub>13</sub>F<sub>3</sub>O<sub>2</sub>Na]: 257.0760, found: 257.0764;

Enantiomeric excess was determined by HPLC with a Chiralcel OD-H column (80:1 hexane:2-propanol,  $\lambda$ =254 nm), 1.0 mL/min; major enantiomer *tr* = 39.2 min, minor enantiomer *tr* = 52.8 min, after conversion to the monobenzoyl ester.

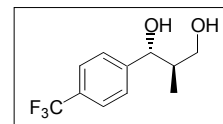

#### **(1*R*, 2*R*)-1-Phenyl-2-methylpropane-1,3-diol<sup>1</sup> (3)**

was known compound.

Enantiometric excess was determined by HPLC with a Chiralpak AD-H column (30:1 hexane:2-propanol,  $\lambda$ =230 nm), 1.0 mL/min; major enantiomer *tr* = 27.2 min, minor enantiomer *tr* = 38.6 min, after conversion to the monobenzoyl ester.

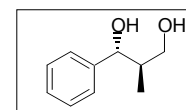

The absolute stereochemistry of the aldol **3** was determined by the chiral HPLC analysis by comparing the retention time of the present aldol product with that synthesized by L-proline in DMF by MacMillan's

procedure<sup>1</sup>.

**(1*R*,2*R*)-1-(Furan-2-yl)-2-methylpropane-1,3-diol<sup>2</sup> (**4**)**

was known compound.

Enantiomeric excess was determined by HPLC with a Chiralpak AS-H column (100:1 hexane:2-propanol), 0.5 mL/min; major enantiomer *tr* = 42.4 min, minor enantiomer *tr* = 47.8 min, after conversion to the monobenzoyl ester.

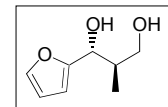

The absolute stereochemistry of the aldols **1**, **2**, **4** were assumed by the chiral HPLC analysis by comparing the retention time of the present aldol product with that synthesized by L-proline in DMF by MacMillan's procedure<sup>1</sup>.

**4,4-Dimethoxy-2-benzylbutane-1,3-diol (diastereomeric mixture (*anti* : *syn* = 3.3 : 1)) (**5**)**

<sup>1</sup>H NMR (400 MHz, CDCl<sub>3</sub>): δ 2.07-2.17 (0.77H, m), 2.45-2.48 (0.23H, m), 2.67 (0.23H, d, *J* = 2.4 Hz), 2.72 (0.77H, d, *J* = 3.2 Hz), 2.80-2.92 (3H, m), 3.34 (2.31H, s), 3.40 (0.69H, s), 3.45 (2.31H, s), 3.49 (0.69H, s), 3.62-3.73 (2H, m), 3.90 (0.77H, dt, *J* = 11.6, 3.2 Hz), 3.95 (0.23H, dt, *J* = 2.4, 6.8 Hz), 4.41 (0.23H, d, *J* = 6.8 Hz), 4.49 (0.77H, d, *J* = 6.8 Hz), 7.22-7.36 (5H, m);

<sup>13</sup>C NMR (100 MHz, CDCl<sub>3</sub>): δ 31.7, 35.6, 42.6, 43.6, 54.8, 55.1, 55.3, 55.5, 62.8, 64.3, 73.4, 73.7, 105.2, 105.6, 126.4, 126.5, 128.8, 129.6, 140.6, 141.1;

IR (neat): ν 3423, 3061, 3027, 2936, 2832, 2360, 1496, 1454, 1193, 1133, 1064, 971, 746, 701 cm<sup>-1</sup>;

HRMS (FAB): [M+Na] calcd for [C<sub>13</sub>H<sub>20</sub>O<sub>4</sub>Na]: 263.1254, found: 263.1248;

Enantiomeric excess of major *anti* isomer was determined by HPLC with a Chiralpak IA column (50:1 hexane:2-propanol, λ = 254 nm), 1.0 mL/min; major enantiomer *tr* = 21.2 min, minor enantiomer *tr* = 19.6 min after conversion to the monobenzoyl ester.

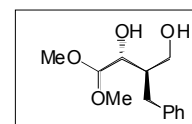

**Typical procedure of cross-aldol reaction between dimethoxyacetaldehyde and another aldehyde catalyzed by proline in the presence of water**

To a mixture of 60 wt% aqueous solution of dimethoxyacetaldehyde (60 μL, 0.4 mmol), L-proline (9 mg, 0.08 mmol) and was added 2,2-dimethyl-1,3-dioxan-5-one (238 μL, 2.0 mmol) successively at room temperature. After stirring the reaction mixture for 16 hours at that temperature. The reaction was quenched with pH 7.0 phosphate buffer solution and the organic materials were extracted with ethyl acetate three times and the combined organic extracts were dried over anhydrous Na<sub>2</sub>SO<sub>4</sub>, and concentrated in vacuo after filtration. Purification by silicagel column chromatography (ethyl acetate:hexane=1:5 ~ 1:1) gave (4*R*, 1'*R*)-4-(1'-hydroxy-2',2'-dimethoxyethyl)-2,2-dimethyl-1,3-dioxan-5-one (44 mg, 0.19 mmol) in 47% yield.

**(2*R*, 1'*R*)-2-(1'-Hydroxy-2',2'-dimethoxyethyl)-cyclohexan-1-one (**6**)**

<sup>1</sup>H NMR (400 MHz, CDCl<sub>3</sub>): δ 1.61-1.82 (3H, m), 1.85-1.91 (1H, m), 2.03-2.12 (2H, m), 2.28-2.39 (2H, m), 2.65-2.70 (1H, m), 3.17 (1H, d, *J* = 7.6 Hz), 3.39 (3H, s), 3.43 (3H, s), 3.58-3.62 (1H, m), 4.47 (1H, d, *J* = 5.6 Hz);

<sup>13</sup>C NMR (100 MHz, CDCl<sub>3</sub>): δ 24.9, 27.8, 31.4, 42.9, 51.4, 54.4, 55.6, 73.0, 105.5, 214.8;

IR (neat): ν 3499, 2937, 2864, 2833, 1704, 1450, 1191, 1123, 1078, 972 cm<sup>-1</sup>;

HRMS (FAB): [M+Na] calcd for [C<sub>10</sub>H<sub>18</sub>O<sub>4</sub>Na]: 225.1097, found: 225.1089;

Enantiomeric excess was determined by HPLC with a Chiralpak AS-H column (100:1 hexane:2-propanol, λ = 254 nm), 1.0 mL/min; major enantiomer *tr* = 7.3 min, minor enantiomer *tr* = 6.8 min, after conversion to the monobenzoyl ester.

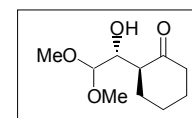

**(2*R*, 1'*R*)-2-(1'-Hydroxy-2',2'-dimethoxyethyl)-cyclopentan-1-one (**7**)**

<sup>1</sup>H NMR (600 MHz, CDCl<sub>3</sub>): δ 1.73-1.81 (1H, m), 1.87-1.94 (1H, m), 2.01-2.09 (1H, m), 2.11-2.22 (2H, m), 2.28-2.36 (1H, m), 2.40-2.44 (1H, m), 3.02 (1H, d, *J* = 1.6 Hz), 3.46 (3H, s), 3.47 (3H, s), 3.76-3.78 (1H, m), 4.61 (1H, d, *J* = 4.4 Hz);

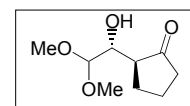

$^{13}\text{C}$  NMR (150 MHz,  $\text{CDCl}_3$ ):  $\delta$  21.1, 26.9, 39.2, 49.2, 54.9, 56.1, 72.9, 105.0, 221.3;  
IR (neat):  $\nu$  3460, 2960, 2833, 1734, 1454, 1404, 1193, 1127, 1060, 969  $\text{cm}^{-1}$ ;  
HRMS(FAB):  $[\text{M}+\text{Na}]$  calcd for  $[\text{C}_9\text{H}_{16}\text{O}_4\text{Na}]$ : 211.0941, found: 211.0932;  
Enantiomeric excess was determined by HPLC with a Chiralcel OD-H column (30:1 hexane:2-propanol,  $\lambda=240$  nm), 1.0 mL/min; major enantiomer  $t_r = 15.4$  min, minor enantiomer  $t_r = 17.8$  min.

**(4*R*, 1'*R*)-4-(1'-Hydroxy-2',2'-dimethoxyethyl)-2,2-dimethyl-1,3-dioxan-5-one<sup>3</sup>**  
**(8)**

was known compound.

Enantiomeric excess was determined by HPLC with a Chiralpak AD-H column (30:1 hexane:2-propanol), 1 mL/min; major enantiomer  $t_r = 19.3$  min, minor enantiomer  $t_r = 27.5$  min, after conversion to the 3,5-dinitrobenzoyl ester.

The absolute stereochemistry of the aldol **8** was determined by the chiral HPLC analysis by comparing the retention time of the 3,5-dinitrobenzoyl ester of the present aldol product with that synthesized by L-proline in DMF by Barbas's procedure<sup>3</sup>.

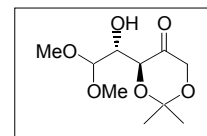

The absolute stereochemistry of the aldols **5**, **6**, **7** were assumed by the chiral HPLC analysis by comparing the retention time of the 3,5-dinitrobenzoyl ester of the present aldols product with that synthesized by L-proline in DMF by Barbas's procedure<sup>3</sup>.

**Typical procedure of cross-aldol reaction between aldehyde and ketone catalyzed by proline in the presence of water**

To a mixture of *o*-chlorobenzaldehyde (45  $\mu\text{L}$ , 0.4 mmol), L-proline (14 mg, 0.12 mmol) and water (22  $\mu\text{L}$ , 1.2 mmol) was added cyclohexanone (123  $\mu\text{L}$ , 1.2 mmol) successively at room temperature. After stirring the reaction mixture for 72 hours at that temperature, the reaction was quenched with pH 7.0 phosphate buffer solution and the organic materials were extracted with ethyl acetate three times and the combined organic extracts were dried over anhydrous  $\text{Na}_2\text{SO}_4$ , and concentrated in vacuo after filtration. Purification by preparative thin layer chromatography (ethyl acetate) gave (2*S*, 1'*R*)-2-(hydroxy-*o*-chlorophenylmethyl)cyclohexan-1-one (67 mg, 0.28 mmol) in 70% yield as the diastereomeric mixture (*anti* : *syn* = 12.5 : 1). Enantiometric excess of *anti* aldol was 97%*ee*.

**(2*S*, 1'*R*)-2-(Hydroxy-*o*-chlorophenylmethyl)cyclohexan-1-one<sup>4</sup>**

was known compound.

Enantiomeric excess was determined by HPLC with a Chiralcel OD-H column (100:1 hexane:2-propanol,  $\lambda=220$  nm), 1.0 mL/min; major enantiomer  $t_r = 14.2$  min, minor enantiomer  $t_r = 16.5$  min.

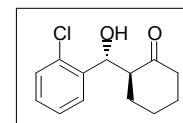

**(2*S*, 1'*R*)-2-(Hydroxy-*o*-chlorophenylmethyl)cyclopentan-1-one**

$^1\text{H}$  NMR (400 MHz,  $\text{CDCl}_3$ ):  $\delta$  1.64-1.78 (3H, m), 1.93-2.07 (1H, m), 2.22-2.35 (1H, m), 2.36-2.52 (2H, m), 4.47 (1H, d,  $J=1.2$  Hz), 5.29 (1H, br d,  $J=9.3$  Hz), 7.15-7.23 (1H, m), 7.26-7.36 (2H, m), 7.52 (1H, m);

$^{13}\text{C}$  NMR (100 MHz,  $\text{CDCl}_3$ ):  $\delta$  20.5, 26.4, 38.7, 55.6, 70.4, 127.4, 128.4, 128.9, 129.3, 132.5, 139.2, 222.8;

IR (neat):  $\nu$  3447, 2965, 1735, 1695, 1440, 1402, 1156, 1024, 749  $\text{cm}^{-1}$ ;

HRMS(FAB):  $[\text{M}+\text{Na}]$  calcd for  $[\text{C}_{12}\text{H}_{13}\text{ClO}_2\text{Na}]$ : 247.0604, found: 247.0506;

Enantiomeric excess was determined by HPLC with a Chiralpak AD-H column (100:1 hexane:2-propanol,  $\lambda=220$  nm), 1.0 mL/min; major enantiomer  $t_r = 28.2$  min, minor enantiomer  $t_r = 37.8$  min.

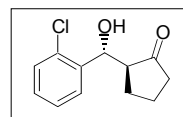

### (2*S*, 1'*R*)-2-(Hydroxy-*p*-nitrophenylmethyl)cyclohexan-1-one<sup>5</sup>

was known compound.

Melting point: 98.0-98.5 °C;

Enantiomeric excess was determined by HPLC with a Chiralpak AS-H column (10:1 hexane:2-propanol,  $\lambda = 254$  nm), 1.0 mL/min; major enantiomer  $t_r = 10.3$  min, minor enantiomer  $t_r = 12.3$  min.

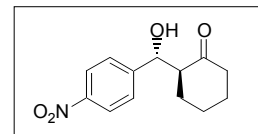

### (2*S*, 1'*R*)-2-(Hydroxy-*p*-trifluoromethylphenylmethyl)cyclohexan-1-one<sup>6</sup>

<sup>1</sup>H NMR (400 MHz, CDCl<sub>3</sub>):  $\delta$  1.24-1.37 (1H, m), 1.48-1.70 (3H, m), 1.77-1.82 (1H, m), 2.09 (1H, ddd,  $J = 3.2, 6.0, 12.8$  Hz), 2.34 (1H, ddt,  $J = 0.8, 6.0, 13.6$  Hz), 2.44-2.50 (1H, m), 2.54-2.61 (1H, m), 3.99 (1H, br s), 4.83 (1H, d,  $J = 8.8$  Hz), 7.42 (2H, d,  $J = 8.0$  Hz), 7.59 (2H, d,  $J = 8.0$  Hz);

<sup>13</sup>C NMR (100 MHz, CDCl<sub>3</sub>):  $\delta$  24.7, 27.7, 30.7, 42.7, 57.2, 74.3, 123.2, 125.3, 127.4, 130.1, 144.9, 215.2;

IR (KBr):  $\nu$  3752, 3361, 2948, 2910, 1700, 1328, 1170, 1138, 1109, 845 cm<sup>-1</sup>;

HRMS(FAB): [M+Na] calcd for [C<sub>14</sub>H<sub>15</sub>F<sub>3</sub>O<sub>2</sub>Na]: 295.0916, found: 295.0907;

$[\alpha]_D^{22} -35.2$  ( $c$  1.00, MeOH), >99% ee for *anti*;

Melting point: 86.5-87.0 °C;

Enantiomeric excess was determined by HPLC with a Chiralcel AD-H column (10:1 hexane:2-propanol,  $\lambda = 254$  nm), 1.0 mL/min; major enantiomer  $t_r = 12.9$  min, minor enantiomer  $t_r = 9.5$  min.

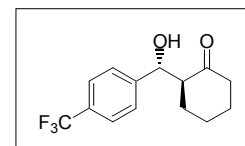

The absolute stereochemistry of the aldols **9**, **10**, **11**, **12** were assumed by the chiral HPLC analysis by comparing the retention time of the present aldol products with that synthesized by Barbas's procedure<sup>7</sup>.

### **Procedure of cross-aldol reaction catalyzed by proline in the presence of water without using any organic solvent (in the case of aldol product was oil)**

To a mixture of *o*-chlorobenzaldehyde (7.9 mL, 70 mmol), L-proline (2.42 g, 21 mmol) and water (3.8 mL) was added cyclopentanone (30.9 mL, 350 mmol) successively at room temperature. After stirring the reaction mixture for 25 hours at that temperature, water (40 mL) and brine (20 mL) were added to the reaction mixture, which was stirred for 10 minutes. After removal of aqueous phase, bulb to bulb distillation of the organic residue at 140 °C under 0.8 mmHg gave (2*S*, 1'*R*)-2-(hydroxy-*o*-chlorophenylmethyl)cyclopentan-1-one (11.7 g, 52.1 mmol) in 75% yield as the diastereomeric mixture (*anti* : *syn* = 1.7 : 1). Enantiomeric excess of *anti* aldol was >99%ee.

### **Procedure of cross-aldol reaction catalyzed by proline in the presence of water without using any organic solvent (in the case of aldol product was crystal)**

To a mixture of *p*-trifluoromethylbenzaldehyde (8.6 mL, 57.4 mmol), L-proline (1.98 g, 17.2 mmol) and water (3.1 mL) was added cyclohexanone (29.6 mL, 287 mmol) successively at room temperature. After stirring the reaction mixture for 96 hours at that temperature, organic phase was washed with water (50 mL) three times to remove proline and the organic phase was concentrated in vacuo. Purification by recrystallization from cyclohexane (57.6 mL) gave (2*S*, 1'*R*)-2-[hydroxy-(*p*-trifluoromethylphenyl)methyl]cyclohexan-1-one (11.4 g, 41.8 mmol) in 73% yield (*anti* : *syn* = >20 : 1). Enantiomeric excess of *anti* aldol was >99%ee.

### References

- [1] A. B. Northup, D. W. C. MacMillan, *J. Am. Chem. Soc.* **2002**, *124*, 6798.
- [2] M. Christlieb, J. E. Davies, J. Eames, R. Hooley, S. Warren, *J. Chem. Soc. Perkin Trans. 1* **2001**, 2983.
- [3] J. T. Suri, S. Mitsumori, K. Albertshofer, F. Tanaka, C. F. Barbas III, *J. Org. Chem.* **2006**, *71*, 3822.
- [4] J. Chen, H. Lu, X. Li, L. Cheng, J. Wan, W. Xiao, *Org. Lett.* **2003**, *5*, 4369.
- [5] A. J. A. Cobb, D. M. Shaw, D. A. Longbottom, J. B. Gold, S. V. Ley, *Org. Biomol. Chem.* **2005**, *3*, 84.
- [6] P. Kotrusz, I. Kmentova, B. Gotov, S. Toma, E. Solcaniova, *Chem. Commun.* **2002**, *21*, 2510.
- [7] K. Sakthivel, W. Notz, T. Bui, C. F. Barbas III, *J. Am. Chem. Soc.* **2001**, *123*, 5260.

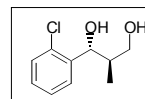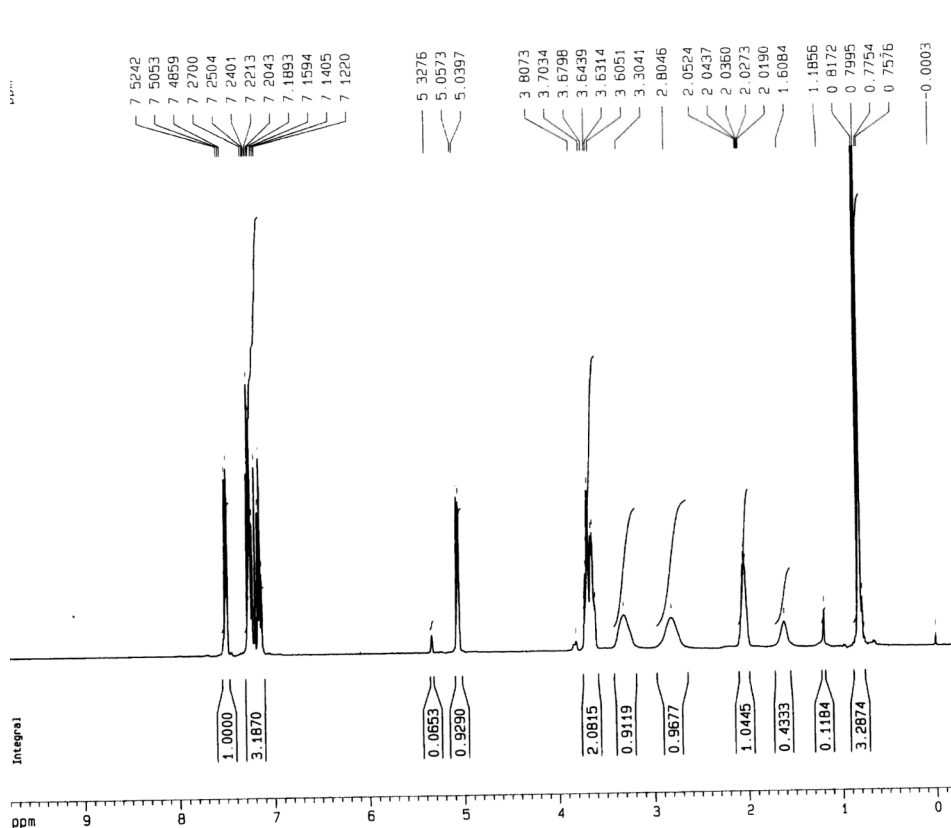

Current Data Parameters  
 NAME Dec14-2005  
 EXPNO 143  
 PROCNO 1

F2 - Acquisition Parameters  
 Date\_ 20051214  
 Time 22.19  
 INSTRUM dpx400  
 PROBHD 5 mm BBO 13C-1  
 PULPROG zg30  
 TD 32768  
 SOLVENT CDCl3  
 NS 8  
 DS 0  
 SWH 8223.685 Hz  
 FIDRES 0.259967 Hz  
 AQ 1.992344 sec  
 RG 203.2  
 OW 60.800 usec  
 OE 6.00 usec  
 TE 303.2 K  
 D1 1.0000000 sec  
 MCREST 0.0000000 sec  
 MCWPK 0.0150000 sec

===== CHANNEL f1 =====  
 NUC1 1H  
 P1 8.10 usec  
 PL1 1.00 dB  
 SF01 400.1324710 MHz

F2 - Processing parameters  
 SI 16384  
 SF 400.1300375 MHz  
 WDW EM  
 SSB 0  
 LB 0.30 Hz  
 GB 8  
 PC 1.00

ID NMR plot parameters  
 CX 20.00 cm  
 CY 12.50 cm  
 F1P 9.800 ppm  
 F1 3921.27 Hz  
 F2P -0.200 ppm  
 F2 -80.03 Hz  
 PPMCM 0.50000 ppm/cm  
 HZCM 200.06502 Hz/cm

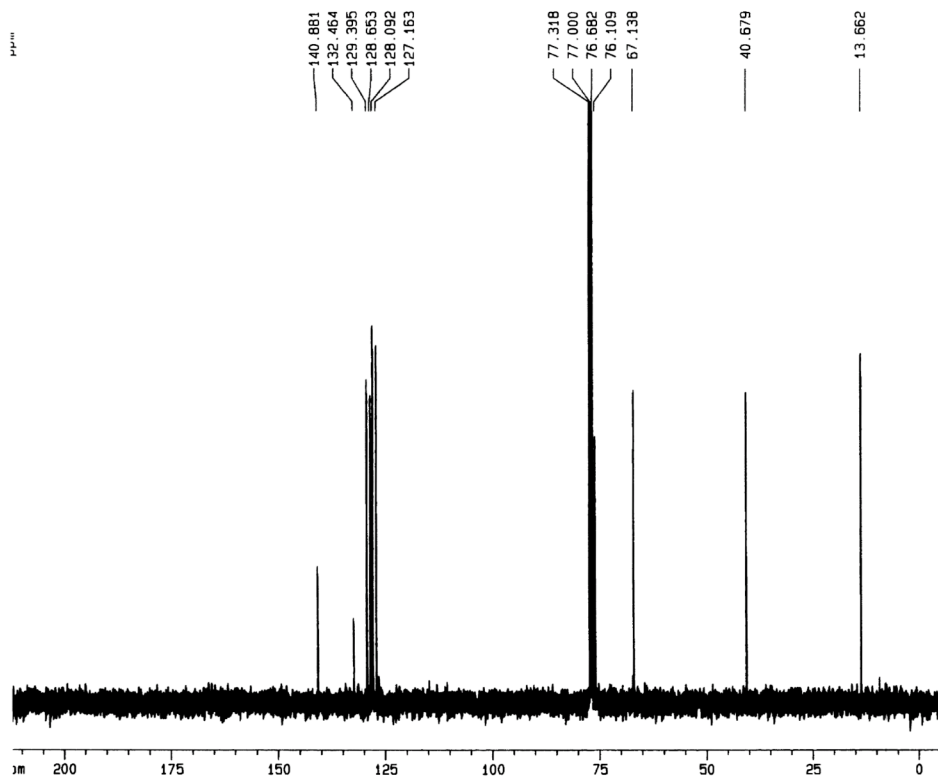

Current Data Parameters  
 NAME Dec14-2005  
 EXPNO 144  
 PROCNO 1

F2 - Acquisition Parameters  
 Date\_ 20051214  
 Time 22.20  
 INSTRUM dpx400  
 PROBHD 5 mm BBO 13C-1  
 PULPROG zgpg30  
 TD 65536  
 SOLVENT CDCl3  
 NS 172  
 DS 2  
 SWH 31847.123 Hz  
 FIDRES 0.485945 Hz  
 AQ 1.0289652 sec  
 RG 2560.3  
 OW 15.700 usec  
 OE 6.00 usec  
 TE 303.2 K  
 D1 2.0000000 sec  
 d11 0.0300000 sec  
 DELTA 1.8999998 sec  
 MCREST 0.0000000 sec  
 MCWPK 0.0150000 sec

===== CHANNEL f1 =====  
 NUC1 13C  
 P1 9.30 usec  
 PL1 3.00 dB  
 SF01 100.6254358 MHz

===== CHANNEL f2 =====  
 CPDPRG2 waltz16  
 NUC2 1H  
 PPRG2 80.00 usec  
 PL2 3.00 dB  
 PL12 22.00 dB  
 PL13 22.00 dB  
 SF02 400.1318005 MHz

F2 - Processing parameters  
 SI 32768  
 SF 100.6127898 MHz  
 WDW EN  
 SSB 0  
 LB 1.00 Hz  
 GB 0  
 PC 1.40

ID NMR plot parameters  
 CX 20.00 cm  
 CY 8.00 cm  
 F1P 215.000 ppm  
 F1 21631.75 Hz  
 F2P -5.000 ppm  
 F2 -503.06 Hz  
 PPMCM 11.00000 ppm/cm  
 HZCM 1106.74048 Hz/cm

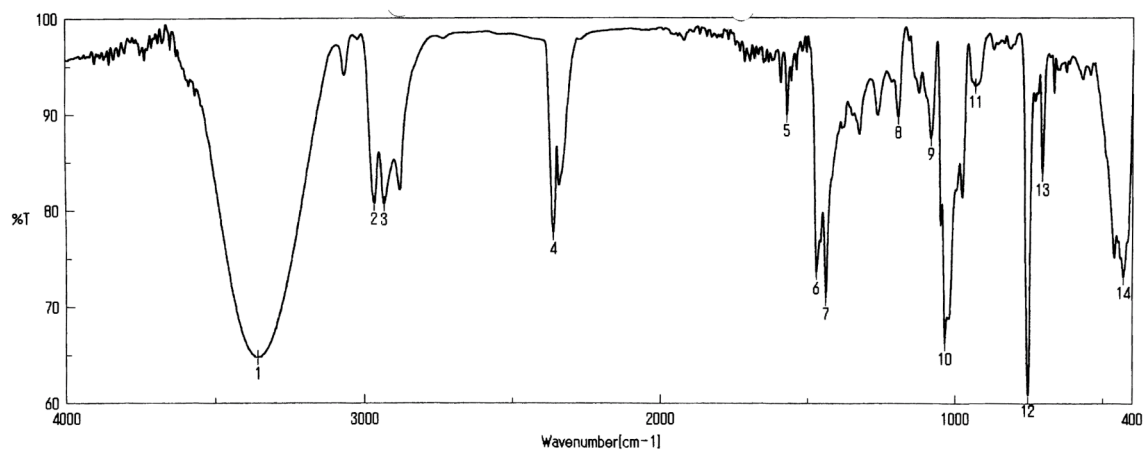

|         |                 |           |          |
|---------|-----------------|-----------|----------|
| 積算回数    | 16              | 分解        | 4 cm-1   |
| ゼロフィリング | ON              | アポダイゼーション | Cosine   |
| ゲイン     | 1               | スキャンスピード  | 2 mm/sec |
| 日時      | 106/01/25 21:13 |           |          |
| 測定者     |                 |           |          |
| ファイル名   | Memory#6        |           |          |
| サンプル名   |                 |           |          |
| コメント    | コメント            |           |          |

|                     |                      |                     |                     |
|---------------------|----------------------|---------------------|---------------------|
| 1: 3357.46, 64.7432 | 2: 2965.98, 80.7845  | 3: 2932.23, 80.7236 | 4: 2360.44, 77.7355 |
| 5: 1572.66, 89.9476 | 6: 1471.42, 73.6355  | 7: 1438.64, 70.9591 | 8: 1194.69, 89.7558 |
| 9: 1082.83, 87.5273 | 10: 1034.62, 66.2728 | 11: 934.34, 92.9301 | 12: 754.03, 60.8449 |
| 13: 705.82, 83.8262 | 14: 431.01, 73.1540  |                     |                     |

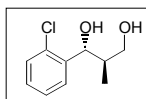

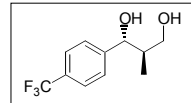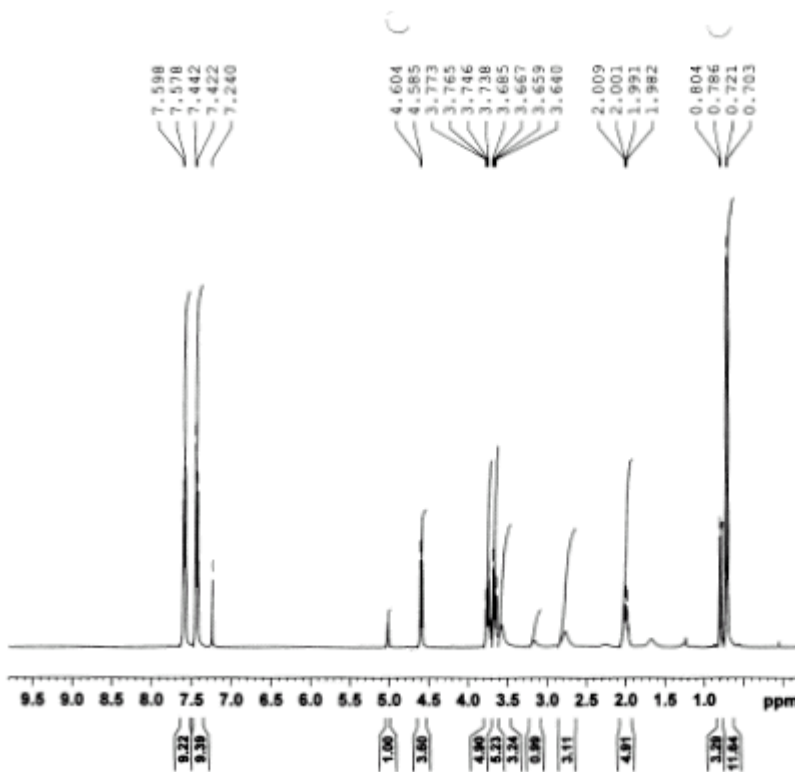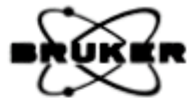

Current Data Parameters  
 NAME Jan16-2006  
 EXPNO 52  
 PROCNO 1

F2 - Acquisition Parameters  
 Date\_ 20060116  
 Time\_ 21.36  
 INSTRUM dpac400  
 PROBRD 5 mm BBO 13C-1  
 PULPROG zg30  
 TD 32768  
 SOLVENT CDCl3  
 NS 8  
 DS 0  
 SWH 822.685 Hz  
 FIDRES 0.230367 Hz  
 AQ 1.5923444 sec  
 RG 161.3  
 SQ 40.800 usec  
 SM 6.00 usec  
 TE 303.2 K  
 DL 1.00000000 sec  
 WREST 0.00000000 sec  
 MCRMK 0.01500000 sec

----- CHANNEL f1 -----  
 NUCL 1H  
 FL 6.10 usec  
 PL1 1.00 dB  
 SFO1 400.1324710 MHz

F2 - Processing parameters  
 SI 16384  
 SF 400.1300187 MHz  
 NDW 0M  
 SSB 0  
 LB 0.30 Hz  
 GB 0  
 PC 1.00

No title

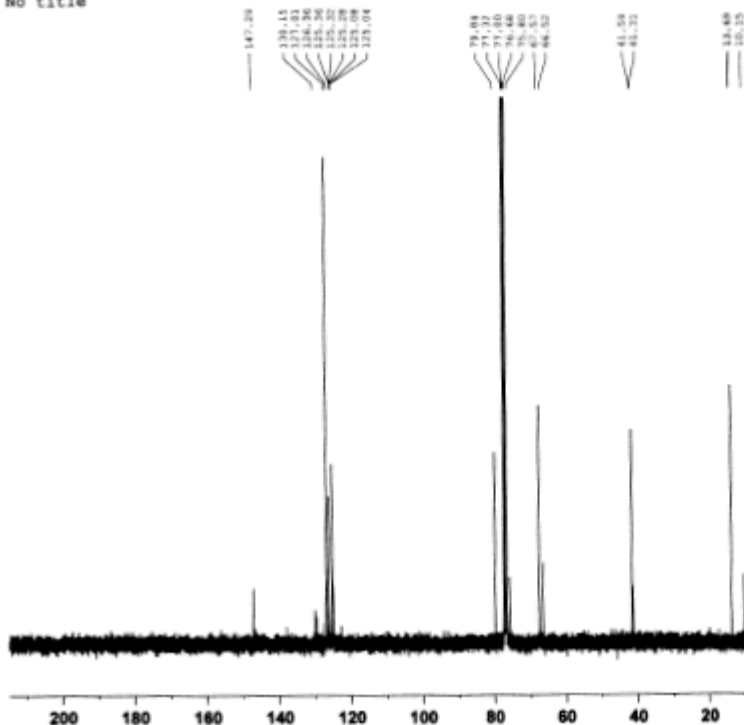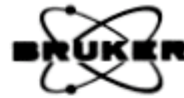

Current Data Parameters  
 NAME Jan16-2006  
 EXPNO 59  
 PROCNO 1

F2 - Acquisition Parameters  
 Date\_ 20060116  
 Time\_ 23.17  
 INSTRUM dpac400  
 PROBRD 5 mm BBO 13C-1  
 PULPROG zgpg30  
 TD 85536  
 SOLVENT CDCl3  
 NS 282  
 DS 2  
 SWH 31847.133 Hz  
 FIDRES 0.488945 Hz  
 AQ 1.0289632 sec  
 RG 2580.3  
 SQ 15.700 usec  
 SM 6.00 usec  
 TE 303.2 K  
 DL 2.00000000 sec  
 SLL 0.03000000 sec  
 DELTA 1.89400000 sec  
 WREST 0.00000000 sec  
 MCRMK 0.01500000 sec

----- CHANNEL f1 -----  
 NUCL 13C  
 FL 9.30 usec  
 PL1 3.00 dB  
 SFO1 100.6254358 MHz

----- CHANNEL f2 -----  
 CPDPRG2 waltz16  
 NUCL 1H  
 PCPD2 80.00 usec  
 PL2 3.00 dB  
 PL12 22.00 dB  
 PL13 22.00 dB  
 SFO2 400.1316005 MHz

F2 - Processing parameters  
 SI 32768  
 SF 100.6127488 MHz  
 NDW 0M  
 SSB 0  
 LB 1.00 Hz  
 GB 0  
 PC 1.40

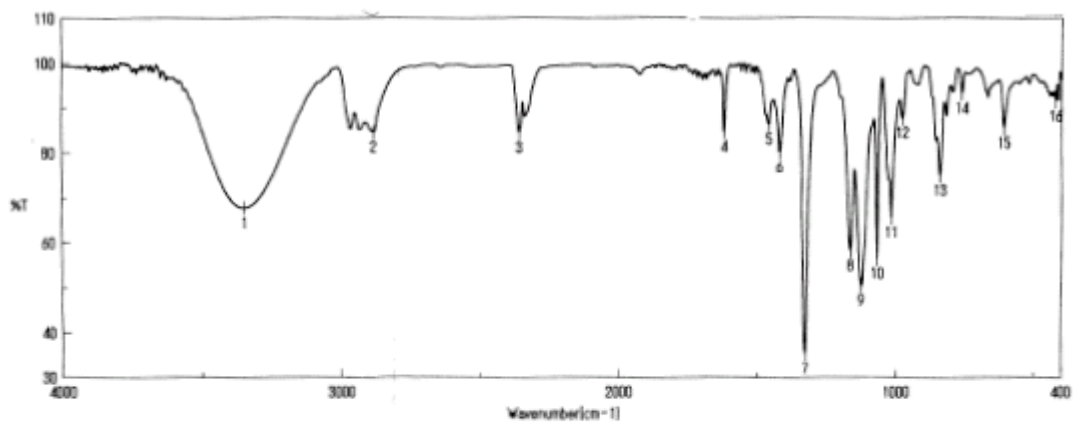

積算回数 10  
 ゼロファイリング ON  
 ガイン 1  
 日時 106/01/25 21:07  
 測定者  
 ファイル名 Memcry#4  
 サンプル名  
 コメント  
 分解 4 cm⁻¹  
 アボダイゼーション Gasline  
 スキャンスピード 2 mm/sec

|                     |                      |                      |                     |
|---------------------|----------------------|----------------------|---------------------|
| 1: 3348.78, 87.5849 | 2: 2884.02, 84.5052  | 3: 2350.44, 84.4507  | 4: 1619.91, 84.7104 |
| 5: 1457.92, 88.3330 | 6: 1419.35, 80.1194  | 7: 1326.79, 35.3028  | 8: 1184.79, 58.2467 |
| 9: 1128.22, 50.4584 | 10: 1088.37, 56.4829 | 11: 1017.27, 85.8149 | 12: 977.73, 87.7352 |
| 13: 840.81, 74.9422 | 14: 782.71, 83.2935  | 15: 809.40, 85.5953  | 16: 421.37, 91.4970 |

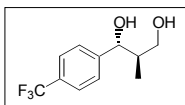



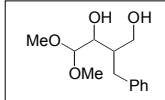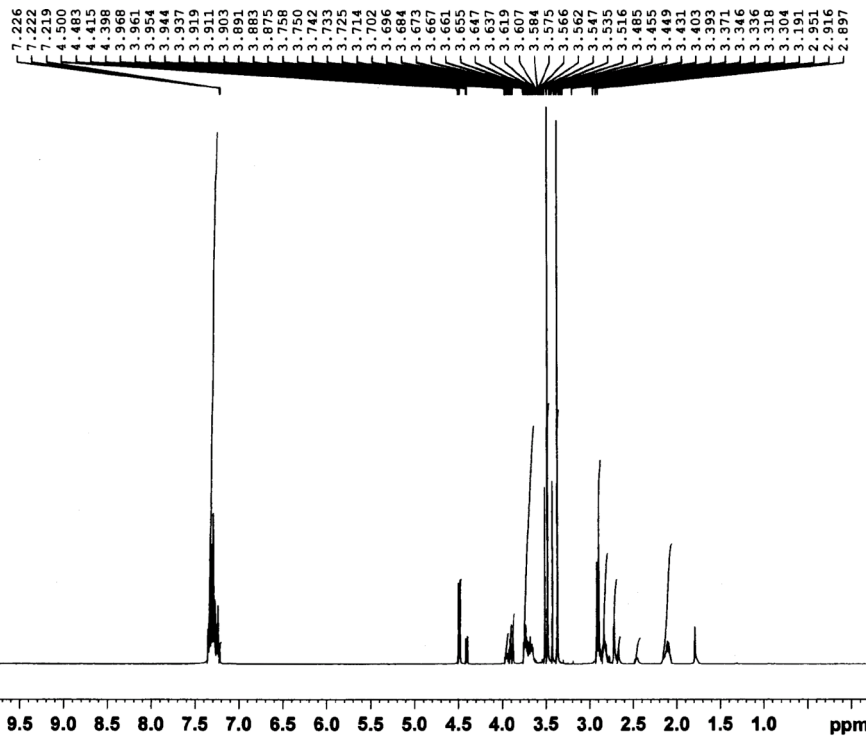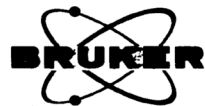

Current Data Parameters  
 NAME Feb23-2006-hayashi  
 EXPNO 41  
 PROCNO 1

F2 - Acquisition Parameters  
 Date 20060223  
 Time 23.27  
 INSTRUM spect  
 PROBHD 5 mm PABBO BB  
 PULPROG zg30  
 TD 65536  
 SOLVENT CDCl3  
 NS 16  
 DS 2  
 SWH 8223.685 Hz  
 FIDRES 0.125483 Hz  
 AQ 3.9846387 sec  
 RG 101  
 DW 60.800 usec  
 DE 6.00 usec  
 TE 298.0 K  
 D1 1.00000000 sec  
 TDO 1

CHANNEL f1  
 NUC1 1H  
 P1 12.00 usec  
 PL1 -4.00 dB  
 SFO1 400.1824713 MHz

F2 - Processing parameters  
 SI 32768  
 SF 400.1799873 MHz  
 WDW EM  
 SSB 0  
 LB 0.30 Hz  
 GB 0  
 PC 1.00

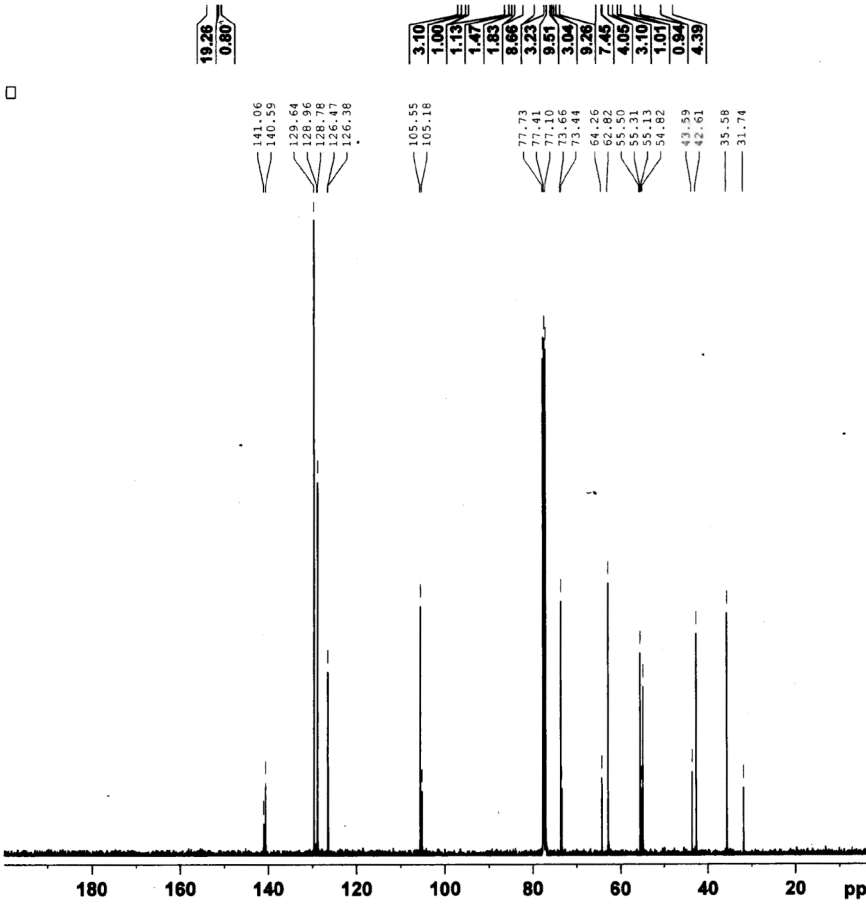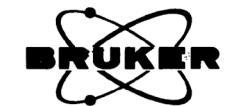

Current Data Parameters  
 NAME Feb24-2006  
 EXPNO 81  
 PROCNO 1

F2 - Acquisition Parameters  
 Date 20060224  
 Time 19.18  
 INSTRUM dpx400  
 PROBHD 5 mm BBO 13C-1  
 PULPROG zgpg30  
 TD 65536  
 SOLVENT CDCl3  
 NS 555  
 DS 2  
 SWH 31847.133 Hz  
 FIDRES 0.485949 Hz  
 AQ 1.0289652 sec  
 RG 3251  
 DW 15.700 usec  
 DE 6.00 usec  
 TE 303.2 K  
 D1 2.00000000 sec  
 d11 0.03000000 sec  
 DELTA 1.89999998 sec  
 MCREST 0.00000000 sec  
 MCWRK 0.01500000 sec

CHANNEL f1  
 NUC1 13C  
 P1 10.00 usec  
 PL1 2.20 dB  
 SFO1 100.6254358 MHz

CHANNEL f2  
 CPDPRG2 waltz16  
 NUC2 1H  
 PCPD2 80.00 usec  
 PL2 3.00 dB  
 PL12 20.00 dB  
 PL13 22.00 dB  
 SFO2 400.1316005 MHz

F2 - Processing parameters  
 SI 32768  
 SF 100.6127290 MHz  
 WDW EM  
 SSB 0  
 LB 1.00 Hz  
 GB 0  
 PC 1.40

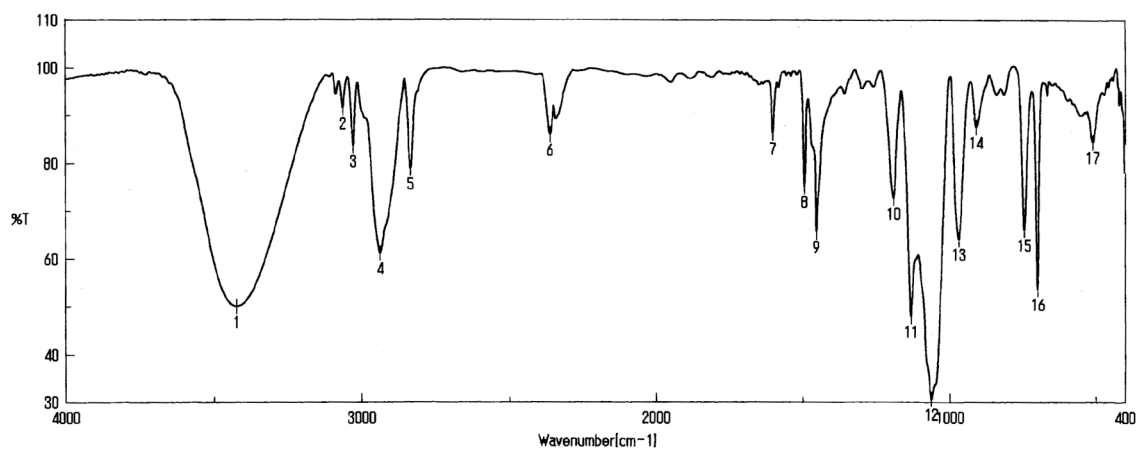

|          |                 |           |          |
|----------|-----------------|-----------|----------|
| 積算回数     | 16              | 分解        | 4 cm-1   |
| ゼロファイリング | ON              | アポダイゼーション | Cosine   |
| ゲイン      | 1               | スキャンスピード  | 2 mm/sec |
| 日時       | 106/02/24 19:21 |           |          |
| 測定者      |                 |           |          |
| ファイル名    | Memory#3        |           |          |
| サンプル名    |                 |           |          |
| コメント     | コメント            |           |          |

|                     |                      |                      |                      |
|---------------------|----------------------|----------------------|----------------------|
| 1: 3423.03, 50.0156 | 2: 3061.44, 91.4794  | 3: 3026.75, 83.6091  | 4: 2936.09, 61.1712  |
| 5: 2831.95, 78.9846 | 6: 2360.44, 85.8987  | 7: 1602.56, 86.3100  | 8: 1495.53, 75.1662  |
| 9: 1454.06, 65.7203 | 10: 1192.76, 72.7447 | 11: 1132.97, 48.0437 | 12: 1063.55, 30.7035 |
| 13: 970.98, 64.1610 | 14: 911.20, 87.6000  | 15: 746.32, 66.1189  | 16: 701.00, 53.7279  |
| 17: 511.04, 84.5132 |                      |                      |                      |

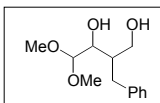

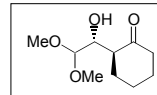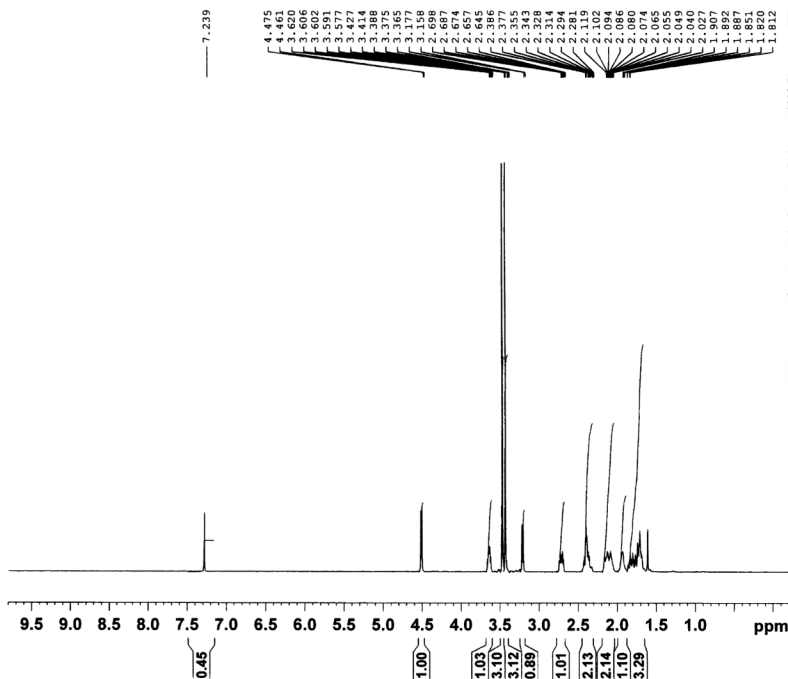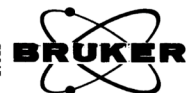

Current Data Parameters  
 NAME May18-2006  
 EXPNO 41  
 PROCNO 1

F2 - Acquisition Parameters  
 Date\_ 20060518  
 Time 13.50  
 INSTRUM dpx400  
 PROBHD 5 mm BBO 13C-1  
 PULPROG zg30  
 TD 32768  
 SOLVENT CDCl3  
 NS 8  
 DS 0  
 SWH 8223.685 Hz  
 FIDRES 0.250967 Hz  
 AQ 1.9923444 sec  
 RG 352  
 DW 60.800 usec  
 DE 6.00 usec  
 TE 303.2 K  
 D1 1.0000000 sec  
 MCREST 0.0000000 sec  
 MCWRK 0.0150000 sec

===== CHANNEL f1 =====  
 NUC1 1H  
 P1 8.10 usec  
 PL1 1.00 dB  
 SFO1 400.1324710 MHz

F2 - Processing parameters  
 SI 16384  
 SF 400.1300000 MHz  
 WDW EM  
 SSB 0  
 LB 0.30 Hz  
 GB 0  
 PC 1.00

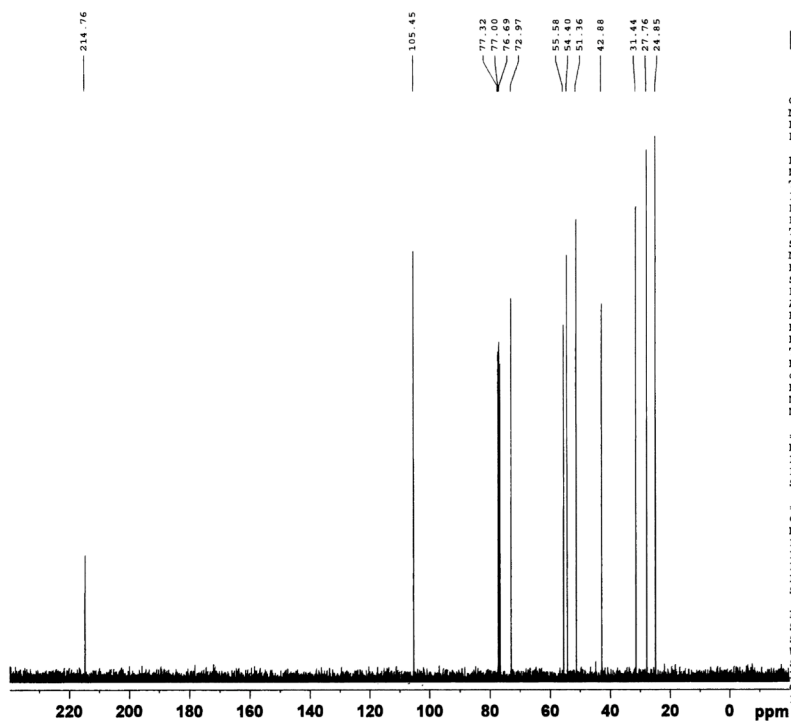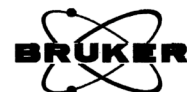

Current Data Parameters  
 NAME May18-2006  
 EXPNO 52  
 PROCNO 1

F2 - Acquisition Parameters  
 Date\_ 20060518  
 Time 15.32  
 INSTRUM dpx400  
 PROBHD 5 mm BBO 13C-1  
 PULPROG zgpg30  
 TD 65536  
 SOLVENT CDCl3  
 NS 277  
 DS 2  
 SWH 31847.133 Hz  
 FIDRES 0.485949 Hz  
 AQ 1.0289652 sec  
 RG 5160.6  
 DW 15.700 usec  
 DE 6.00 usec  
 TE 303.2 K  
 D1 2.0000000 sec  
 d11 0.0300000 sec  
 DELTA 1.89999998 sec  
 MCREST 0.0000000 sec  
 MCWRK 0.0150000 sec

===== CHANNEL f1 =====  
 NUC1 13C  
 P1 10.00 usec  
 PL1 2.20 dB  
 SFO1 100.6254358 MHz

===== CHANNEL f2 =====  
 CPDPRG2 waltz16  
 NUC2 1H  
 PCPD2 80.00 usec  
 PL2 3.00 dB  
 PL12 20.00 dB  
 PL13 22.00 dB  
 SFO2 400.1316005 MHz

F2 - Processing parameters  
 SI 32768  
 SF 100.6127727 MHz  
 WDW HQ  
 SSB 0  
 LB 0.00 Hz  
 GB 0  
 PC 1.40

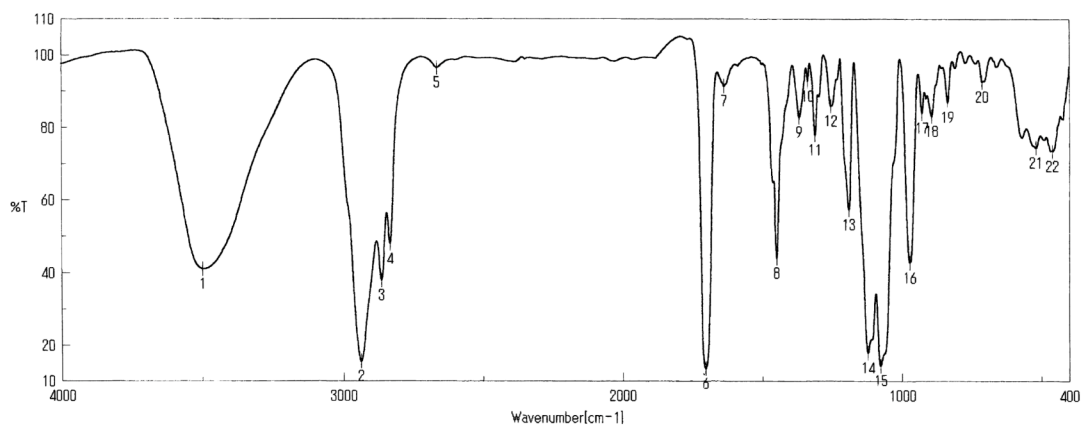

|         |                 |           |          |
|---------|-----------------|-----------|----------|
| 積算回数    | 64              | 分解        | 4 cm-1   |
| ゼロフィリング | ON              | アポダイゼーション | Cosine   |
| ゲイン     | 1               | スキャンスピード  | 2 mm/sec |
| 日時      | 106/05/29 21:30 |           |          |
| 測定者     |                 |           |          |
| ファイル名   | Memory#3        |           |          |
| サンプル名   |                 |           |          |
| コメント    | コメント            |           |          |

|              |         |              |         |              |         |              |         |
|--------------|---------|--------------|---------|--------------|---------|--------------|---------|
| 1: 3499.20,  | 41.0771 | 2: 2937.06,  | 15.5381 | 3: 2864.74,  | 37.9466 | 4: 2833.88,  | 47.9944 |
| 5: 2666.11,  | 96.5365 | 6: 1704.76,  | 13.4889 | 7: 1638.23,  | 91.4756 | 8: 1450.21,  | 44.0295 |
| 9: 1369.21,  | 82.8205 | 10: 1338.36, | 92.8116 | 11: 1313.29, | 78.0197 | 12: 1256.40, | 86.0258 |
| 13: 1191.79, | 57.3338 | 14: 1123.33, | 17.8419 | 15: 1078.01, | 14.2854 | 16: 972.91,  | 42.7452 |
| 17: 928.56,  | 83.9779 | 18: 893.84,  | 83.1425 | 19: 836.95,  | 87.0591 | 20: 712.57,  | 92.5984 |

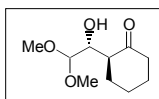

No title

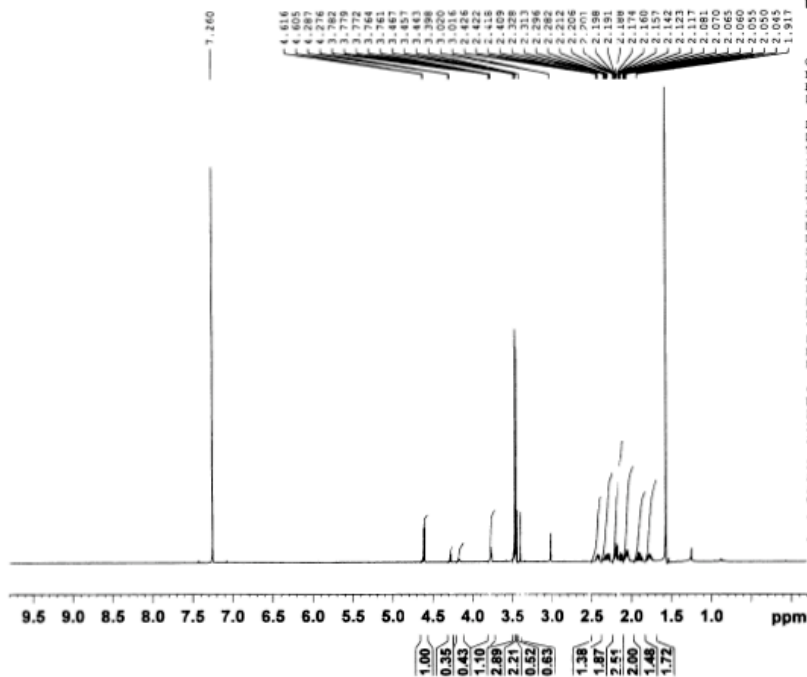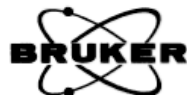

Current Data Parameters  
 NAME May27-2006  
 EXPNO 15  
 PROCNO 1

F2 - Acquisition Parameters  
 Date\_ 20060327  
 Time\_ 18:25  
 INSTRUM av600  
 PROBHD 5 mm CPDUL 13C  
 PULPROG zg30  
 TD 65536  
 SOLVENT CDCl3  
 NS 16  
 DS 2  
 SWH 12376.237 Hz  
 FIDRES 0.18846 Hz  
 AQ 2.6477449 sec  
 RG 25.4  
 DW 40.400 usec  
 DE 6.00 usec  
 TE 298.0 K  
 D1 1.00000000 sec  
 MCKEST 0.00000000 sec  
 MCWRR 0.01500000 sec

----- CHANNEL f1 -----  
 NUC1 1H  
 P1 14.40 usec  
 PL1 -5.80 dB  
 SFO1 600.1337060 MHz

F2 - Processing parameters  
 SI 32768  
 SF 600.1297098 MHz  
 WDW no  
 SSB 0  
 LB 0.00 Hz  
 GB 0  
 PC 1.00

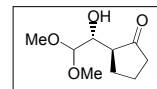

CARBON

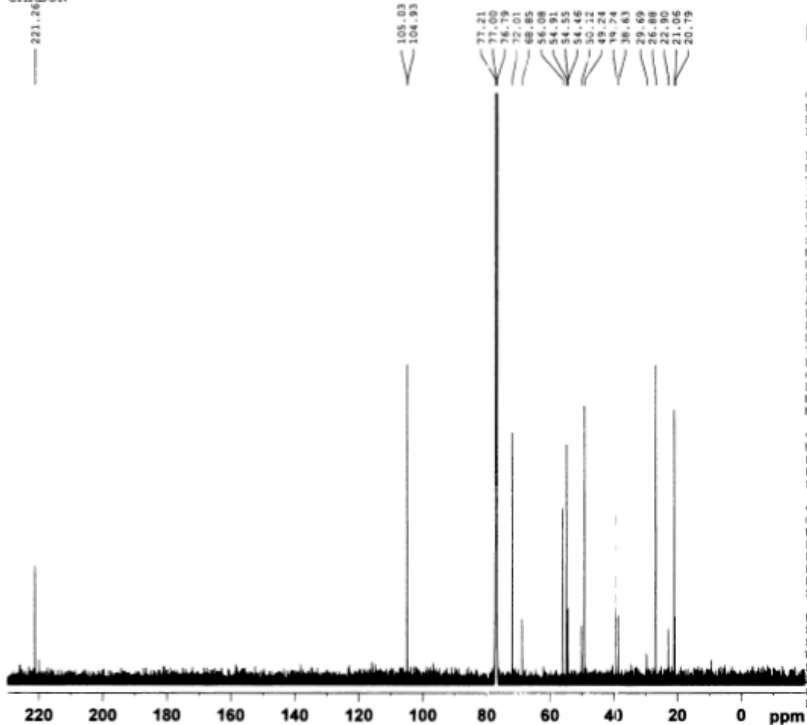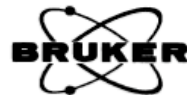

Current Data Parameters  
 NAME May27-2006  
 EXPNO 16  
 PROCNO 1

F2 - Acquisition Parameters  
 Date\_ 20060527  
 Time\_ 18:42  
 INSTRUM av600  
 PROBHD 5 mm CPDUL 13C  
 PULPROG zgpg30  
 TD 65536  
 SOLVENT CDCl3  
 NS 414  
 DS 4  
 SWH 39370.078 Hz  
 FIDRES 0.400740 Hz  
 AQ 0.8323499 sec  
 RG 13004  
 DW 12.700 usec  
 DE 50.00 usec  
 TE 298.0 K  
 D1 2.00000000 sec  
 d11 0.03000000 sec  
 DELTA 1.89999998 sec  
 MCKEST 0.00000000 sec  
 MCWRR 0.01500000 sec

----- CHANNEL f1 -----  
 NUC1 13C  
 P1 10.00 usec  
 PL1 -4.90 dB  
 SFO1 150.9178988 MHz

----- CHANNEL f2 -----  
 CPDPRG2 waltz16  
 MUC2 1H  
 PCPD2 100.00 usec  
 PL2 -5.80 dB  
 PL12 8.00 dB  
 PL13 8.00 dB  
 SFO2 600.1324000 MHz

F2 - Processing parameters  
 SI 32768  
 SF 150.9027373 MHz  
 WDW EM  
 SSB 0  
 LB 1.00 Hz  
 GB 0  
 PC 1.40

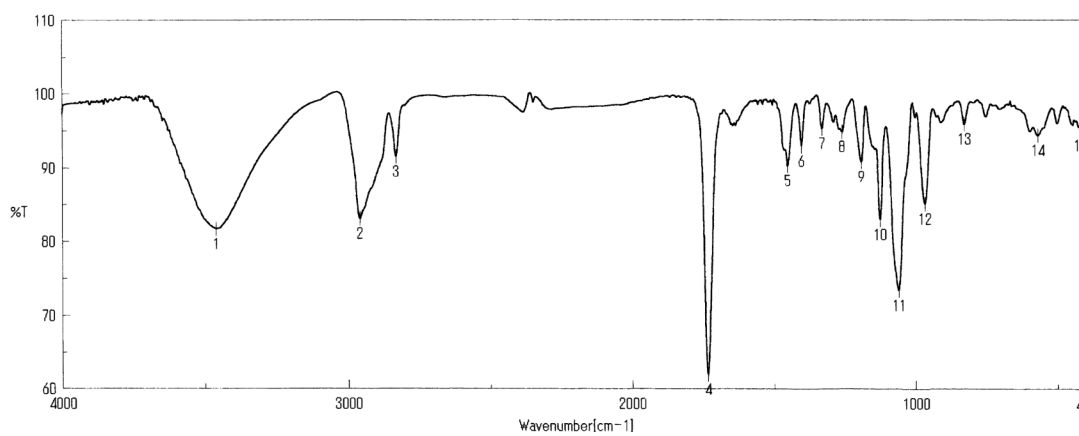

|          |                 |           |          |
|----------|-----------------|-----------|----------|
| 積算回数     | 64              | 分解        | 4 cm-1   |
| ゼロファイリング | ON              | アポダイゼーション | Cosine   |
| ゲイン      | 1               | スキャンスピード  | 2 mm/sec |
| 日時       | 106/05/29 21:40 |           |          |
| 測定者      |                 |           |          |
| ファイル名    | Memory#3        |           |          |
| サンプル名    |                 |           |          |
| コメント     | コメント            |           |          |

|                     |                      |                      |                     |
|---------------------|----------------------|----------------------|---------------------|
| 1: 3460.63, 81.7020 | 2: 2960.20, 83.0975  | 3: 2833.88, 91.5482  | 4: 1734.66, 61.9678 |
| 5: 1454.06, 90.3252 | 6: 1404.89, 92.9734  | 7: 1332.57, 95.3790  | 8: 1262.18, 94.9252 |
| 9: 1193.72, 90.8441 | 10: 1127.19, 82.9879 | 11: 1060.66, 73.4402 | 12: 969.05, 85.0852 |
| 13: 829.24, 95.9570 | 14: 570.83, 94.4109  | 15: 420.41, 95.0951  |                     |

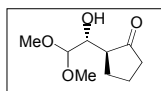

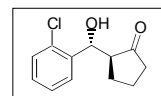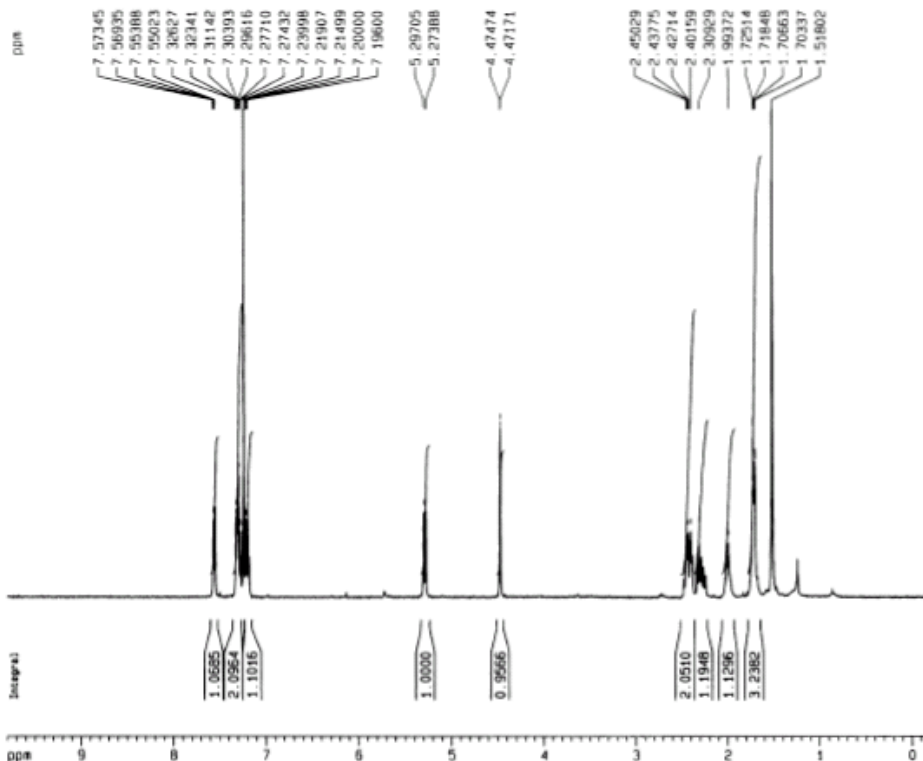

Current Data Parameters  
 NAME Jan25-2006  
 EXPNO 31  
 PROCNO 1

F2 - Acquisition Parameters  
 Date\_ 20060125  
 Time 12.24  
 INSTRUM gpc450  
 PROBN0 5 mm BBO 13C-1  
 PULPROG zgpg30  
 TD 65536  
 SOLVENT CDCl3  
 NS 8  
 DS 0  
 SWH 8223.685 Hz  
 FIDRES 0.250967 Hz  
 AQ 1.9923444 sec  
 RG 456.1  
 DW 60.800 usec  
 DE 6.00 usec  
 TE 303.2 K  
 D1 1.0000000 sec  
 MCHPST 0.0000000 sec  
 MCHW 0.0150000 sec

\*\*\*\*\* CHANNEL f1 \*\*\*\*\*  
 NUC1 1H  
 P1 8.10 usec  
 PL1 1.00 dB  
 SFO1 400.1304710 MHz

F2 - Processing parameters  
 SI 16384  
 SF 400.1300172 MHz  
 WDW EM  
 SSB 0  
 LB 0.30 Hz  
 GB 0  
 PC 1.00

1D NMR plot parameters  
 CX 20.00 cm  
 CY 12.50 cm  
 F1P 9.800 ppm  
 F1 3921.27 Hz  
 F2P -0.200 ppm  
 F2 -80.03 Hz  
 PPHW 0.50000 ppm/cm  
 HZCX 200.06500 Hz/cm

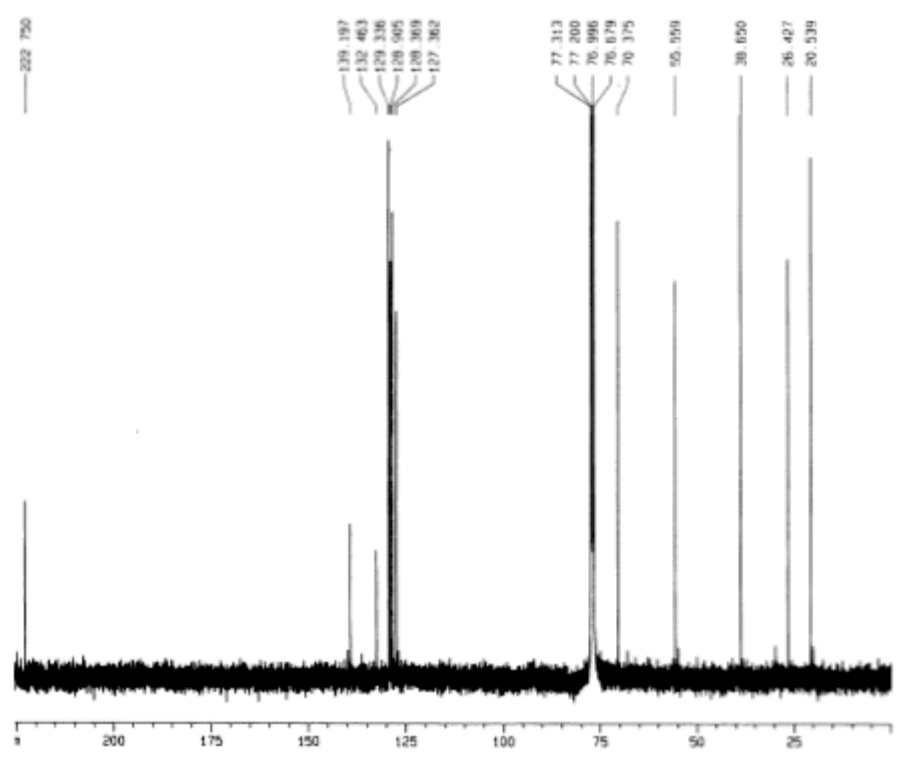

Current Data Parameters  
 NAME Jan25-2006  
 EXPNO 130  
 PROCNO 1

F2 - Acquisition Parameters  
 Date\_ 20060126  
 Time 21.34  
 INSTRUM gpc450  
 PROBN0 5 mm BBO 13C-1  
 PULPROG zgpg30  
 TD 65536  
 SOLVENT CDCl3  
 NS 8  
 DS 0  
 SWH 20947.123 Hz  
 FIDRES 0.499690 Hz  
 AQ 1.528955 sec  
 RG 1824.0  
 DW 15.700 usec  
 DE 6.00 usec  
 TE 303.2 K  
 D1 3.0000000 sec  
 D11 0.2000000 sec  
 DELTA 2.8000010 sec  
 MCHPST 0.0000000 sec  
 MCHW 0.0150000 sec

\*\*\*\*\* CHANNEL f1 \*\*\*\*\*  
 NUC1 13C  
 P1 9.20 usec  
 PL1 3.00 dB  
 SFO1 101.6254950 MHz

\*\*\*\*\* CHANNEL f2 \*\*\*\*\*  
 NUC2 1H  
 PRC2 86.00 usec  
 PL2 3.00 dB  
 PL12 22.00 dB  
 PL13 22.00 dB  
 SFO2 400.1318075 MHz

F2 - Processing parameters  
 SI 32768  
 SF 101.6250900 MHz  
 WDW EM  
 SSB 0  
 LB 1.00 Hz  
 GB 0  
 PC 1.00

1D NMR plot parameters  
 CX 20.00 cm  
 CY 12.50 cm  
 F1P 230.000 ppm  
 F1 20146.54 Hz  
 F2P 0.000 ppm  
 F2 0.00 Hz  
 PPHW 11.50000 ppm/cm  
 HZCX 1057.04888 Hz/cm

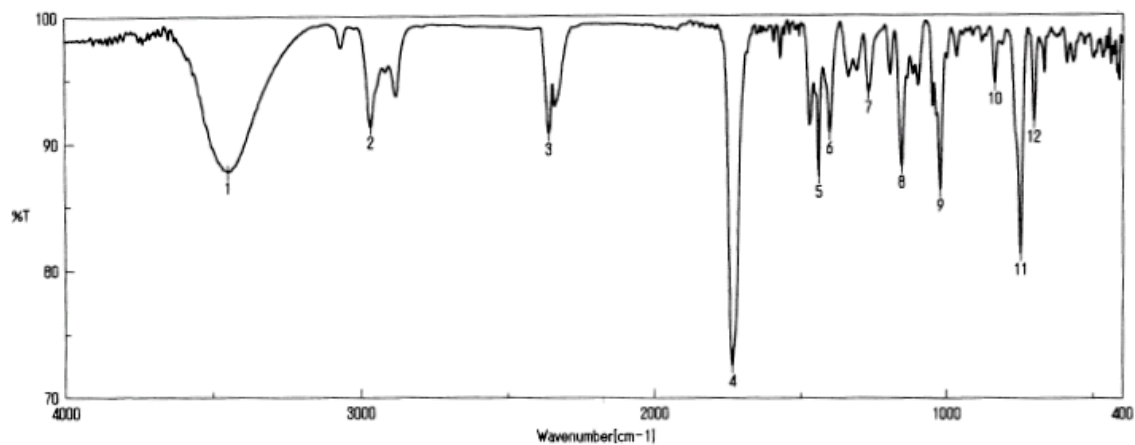

|          |                 |           |          |
|----------|-----------------|-----------|----------|
| 積算回数     | 16              | 分解        | 4 cm-1   |
| ゼロファイリング | ON              | アポダイゼーション | Cosine   |
| ゲイン      | 1               | スキャンスピード  | 2 mm/sec |
| 日時       | 106/01/25 20:58 |           |          |
| 測定者      |                 |           |          |
| ファイル名    | Memory#3        |           |          |
| サンプル名    |                 |           |          |
| コメント     | コメント            |           |          |

|                     |                     |                     |                     |
|---------------------|---------------------|---------------------|---------------------|
| 1: 3447.13, 87.7456 | 2: 2985.02, 91.2738 | 3: 2380.44, 90.7449 | 4: 1734.86, 72.5640 |
| 5: 1439.60, 87.4352 | 6: 1402.00, 90.8397 | 7: 1269.90, 94.0409 | 8: 1156.12, 88.1940 |
| 9: 1024.02, 86.3197 | 10: 838.86, 94.8881 | 11: 749.21, 81.3388 | 12: 704.85, 91.6975 |

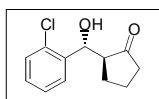



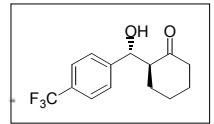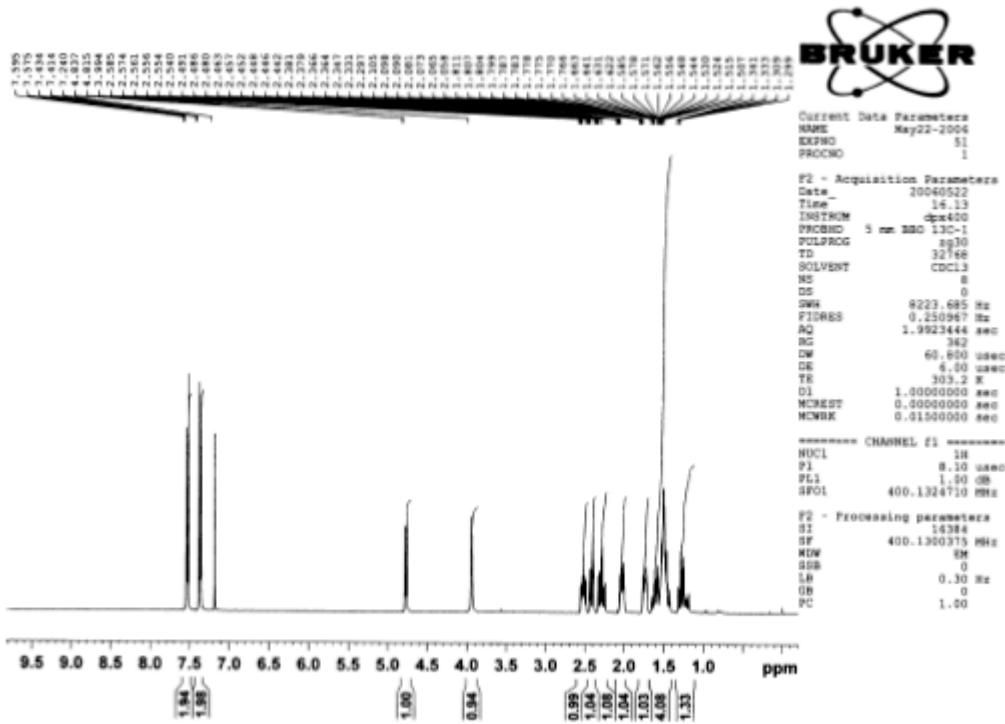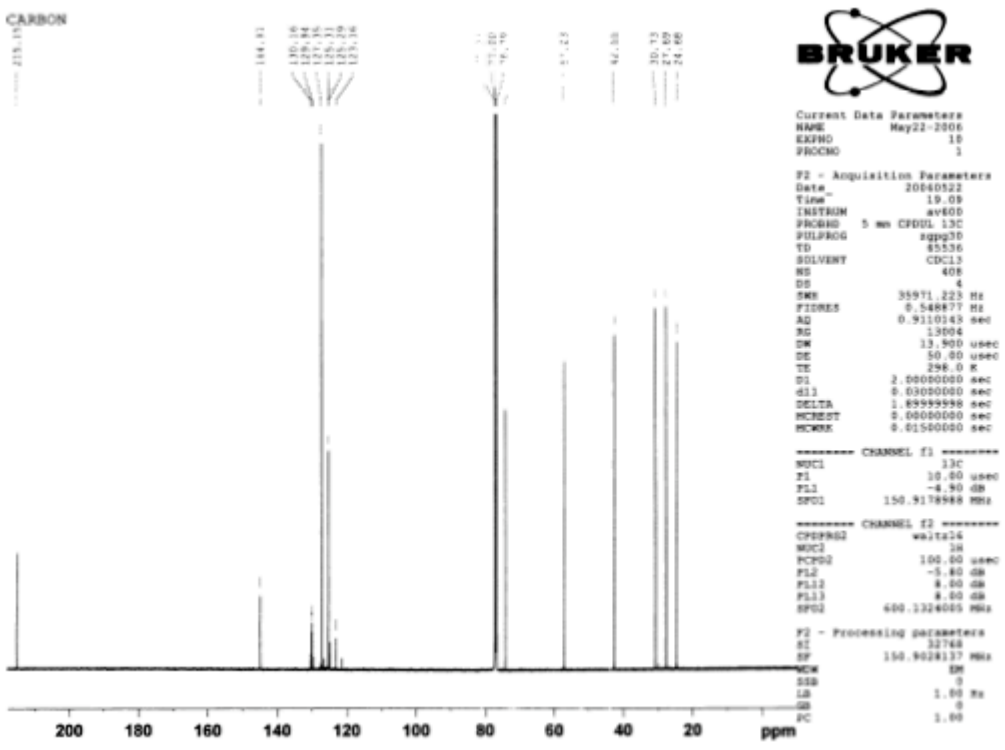

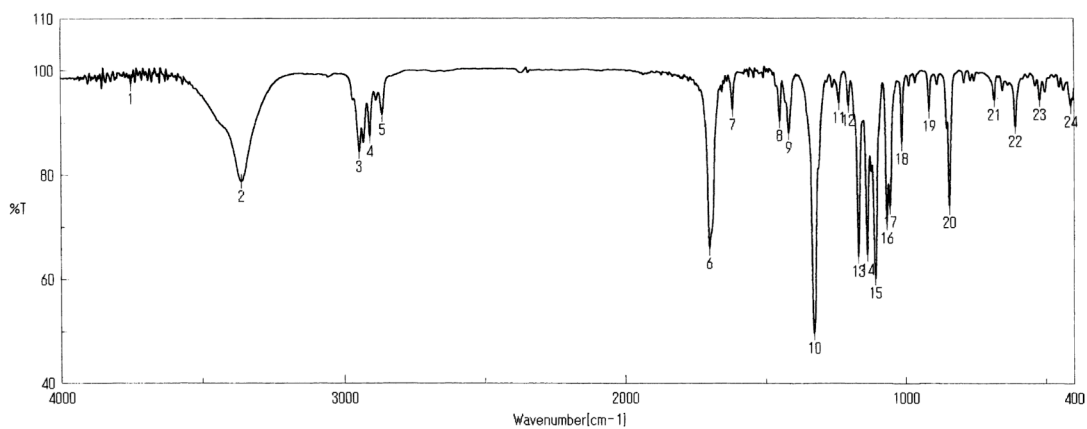

|         |                 |           |                    |
|---------|-----------------|-----------|--------------------|
| 積算回数    | 64              | 分解        | 4 cm <sup>-1</sup> |
| ゼロフィリング | ON              | アポダイゼーション | Cosine             |
| ゲイン     | 2               | スキャンスピード  | 2 mm/sec           |
| 日時      | 106/05/29 21:17 |           |                    |
| 測定者     |                 |           |                    |
| ファイル名   | Memory#3        |           |                    |
| サンプル名   |                 |           |                    |
| コメント    | コメント            |           |                    |

|                      |                      |                      |                      |
|----------------------|----------------------|----------------------|----------------------|
| 1: 3751.83, 97.4254  | 2: 3361.32, 78.7848  | 3: 2947.66, 84.4286  | 4: 2910.06, 87.3490  |
| 5: 2865.70, 91.5038  | 6: 1699.94, 65.8844  | 7: 1617.98, 92.4863  | 8: 1450.21, 90.3235  |
| 9: 1417.42, 88.0405  | 10: 1327.75, 49.7135 | 11: 1239.04, 93.8274 | 12: 1205.29, 93.3165 |
| 13: 1169.62, 64.4192 | 14: 1137.80, 64.7555 | 15: 1108.87, 60.2842 | 16: 1067.41, 70.7612 |
| 17: 1056.80, 73.8871 | 18: 1014.37, 85.9426 | 19: 916.99, 92.1844  | 20: 844.67, 73.8058  |

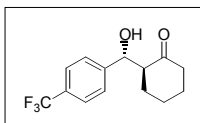

Supplement: b613262f.pdf [file b613262f.pdf]
